# Supplementary material for: The right thalamus may play an important role in anesthesia-awakening regulation in frogs
Source: PeerJ. 2018 Mar 15;6:e4516. doi: 10.7717/peerj.4516 (PMC5857353; doi:10.7717/peerj.4516)
Supplement: Figure S1 — There were 2 electrodes above the telencephalon, diencephalon and mesencephalon respectively, while the reference was above the cerebellum. [file peerj-06-4516-s003.doc]

**The Right Thalamus may Play an Important Role in Anaesthesia-Awakening Regulation in Frogs**

**Yanzhu Fan 1,2, Xizi Yue1,** **Fei Xue1, Steven E. Brauth3,** **Yezhong Tang1, and Guangzhan Fang1,***

1Chengdu Institute of Biology, Chinese Academy of Sciences, No.9 Section 4, Renmin South Road, Chengdu, Sichuan, People's Republic of China

2University of Chinese Academy of Sciences, 19A Yuquan Road, Beijing, People's Republic of China

3Department of Psychology, University of Maryland, College Park, MD20742, USA

Email: [fanggz@cib.ac.cn](mailto:fanggz@cib.ac.cn)

**Supplementary figure**

**
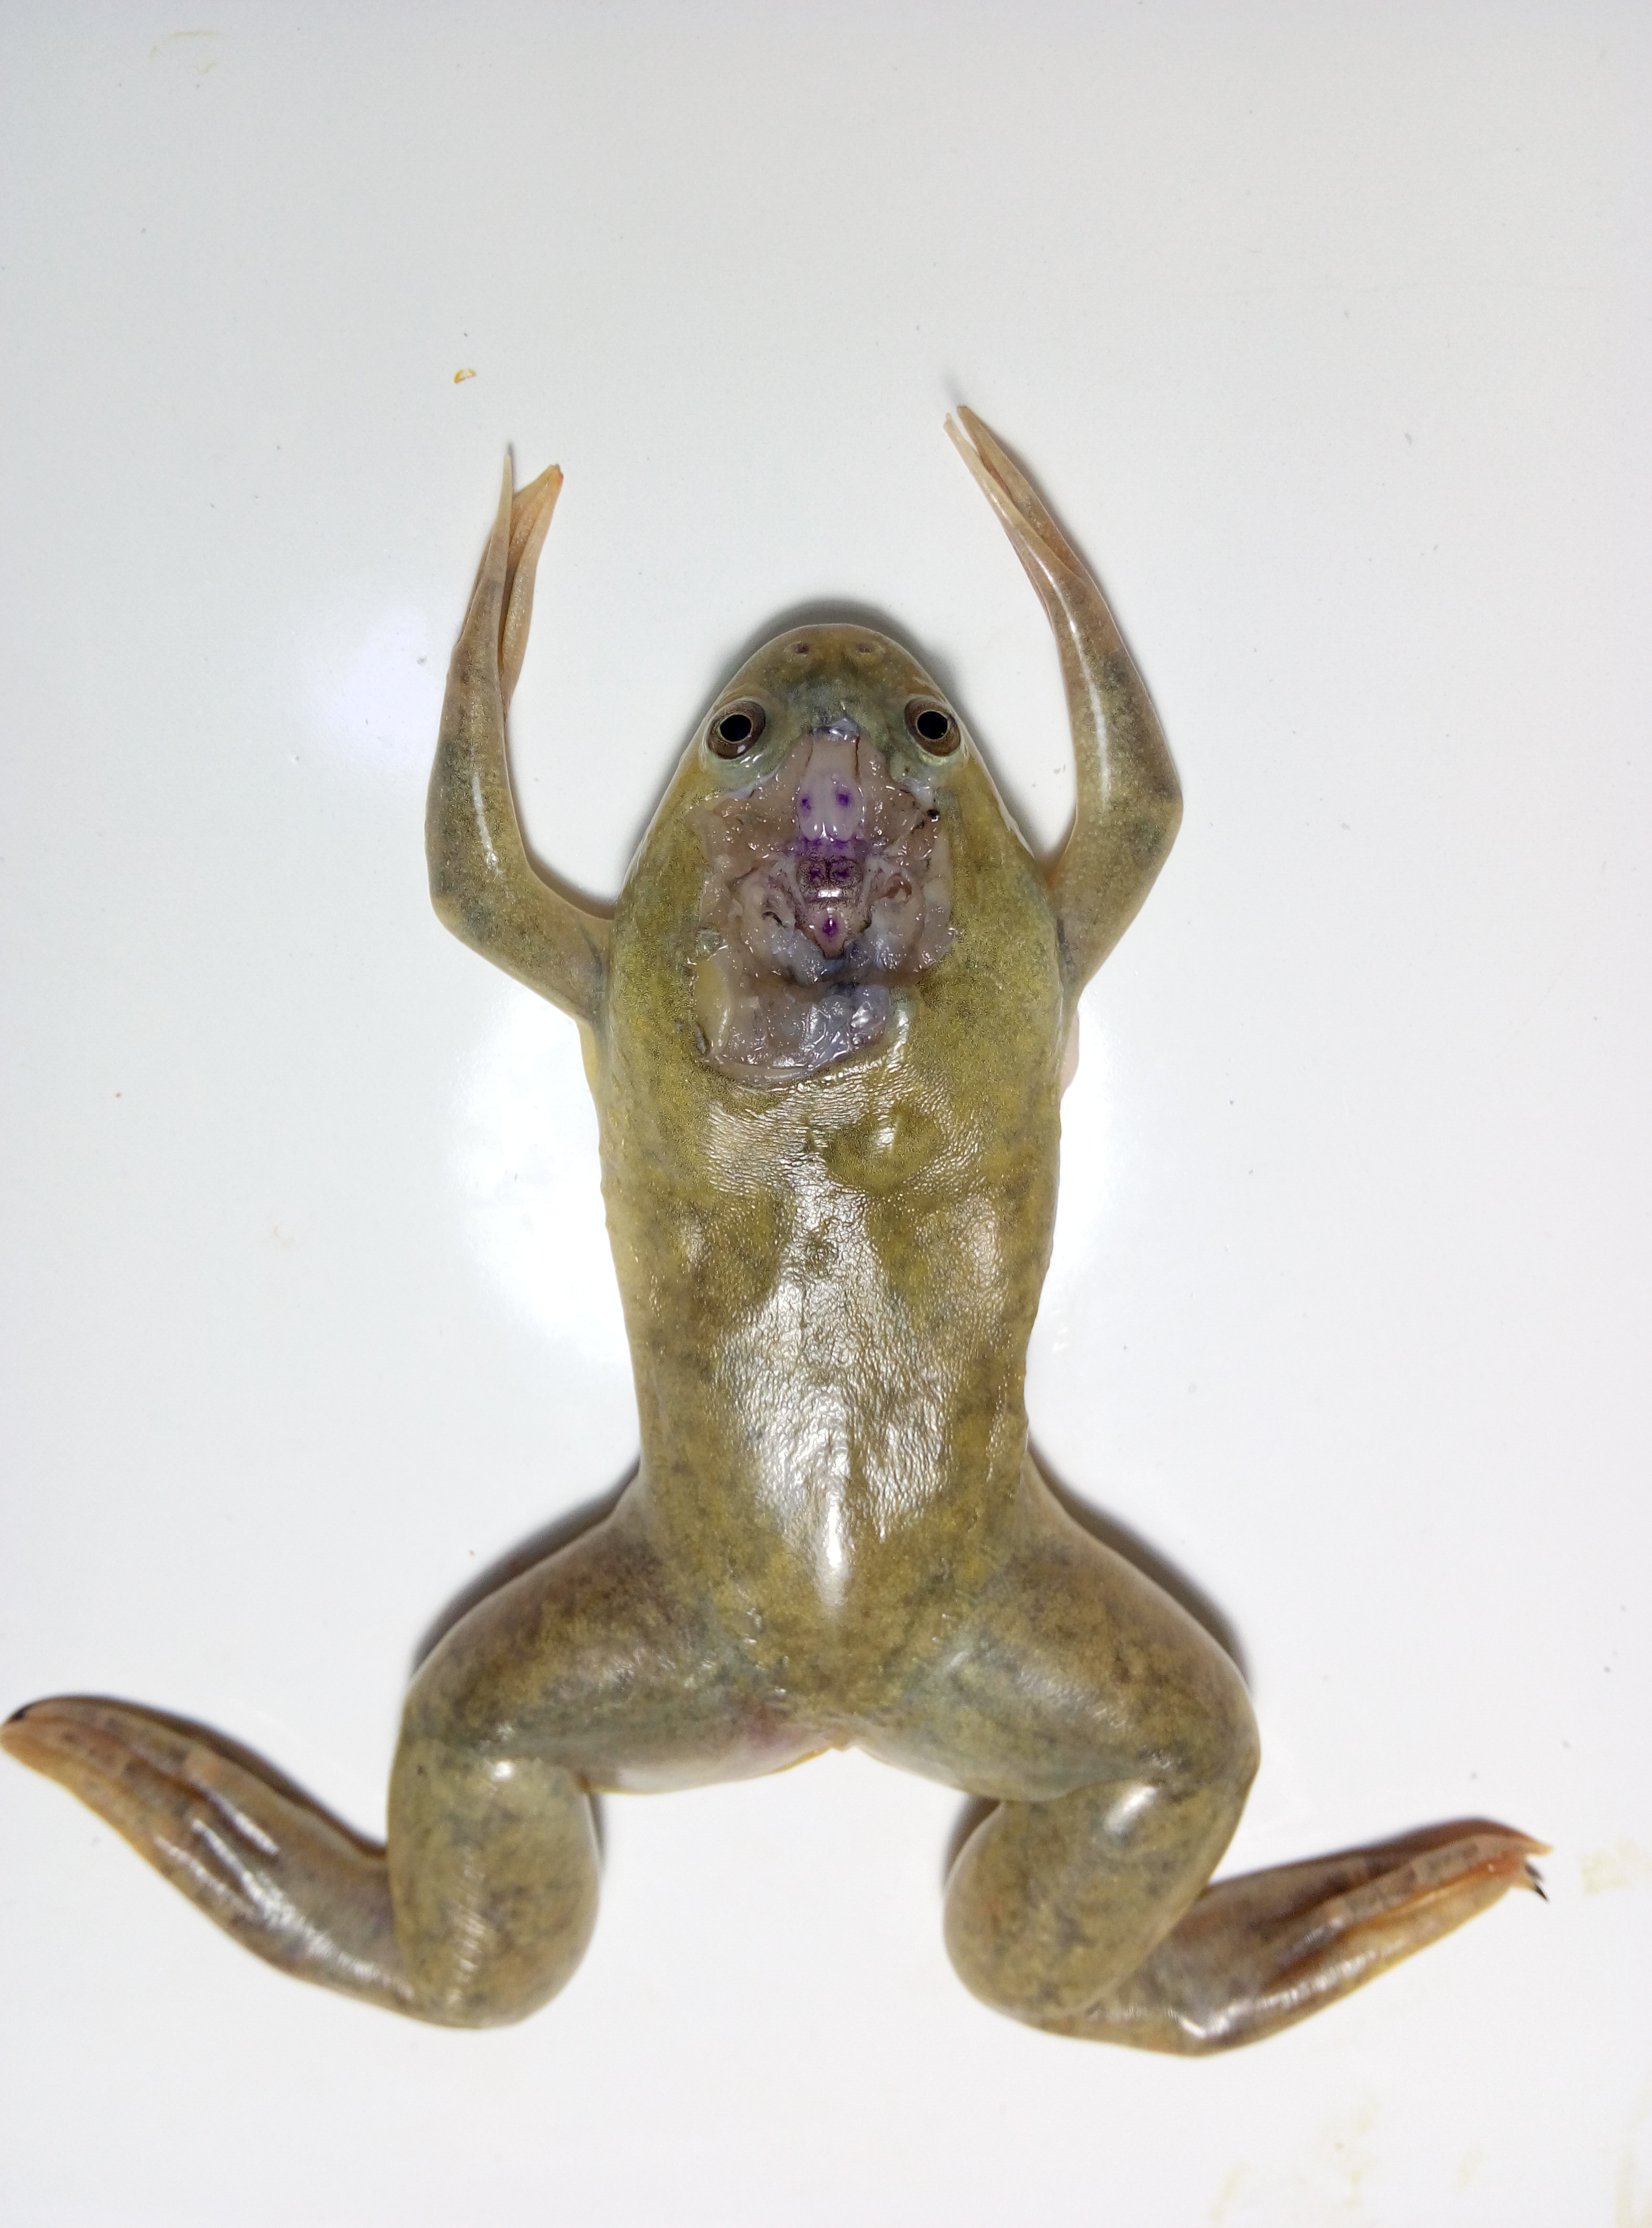
**

**Figure S1. An example showing the positions of 7 electrodes on the skull of a subject. There were 2 electrodes above the telencephalon, diencephalon and mesencephalon respectively, while the reference was above the cerebellum.**
