# Supplementary material for: The right thalamus may play an important role in anesthesia-awakening regulation in frogs
Source: PeerJ. 2018 Mar 15;6:e4516. doi: 10.7717/peerj.4516 (PMC5857353; doi:10.7717/peerj.4516)
Supplement: Supplemental Information 1 — This table includes animals’ weights, durations for Stages II and III, and approximate entropy for each stage. [file peerj-06-4516-s001.xlsx]

## Sheet: Sheet1
Subject ID	Sex(1F；2M)	Weight（g)	Duration of Stage II(min)	Duration of Stage III(min)	ApEn during Stage I for LT	ApEn during Stage I for RT	ApEn during Stage I for LD	ApEn during Stage I for RD	ApEn during Stage I for LM	ApEn during Stage I for RM	ApEn during Stage II for LT	ApEn during Stage II for RT	ApEn during Stage II for LD	ApEn during Stage II for RD	ApEn during Stage II for LM	ApEn during Stage II for RM	ApEn during Stage III for LT	ApEn during Stage III for RT	ApEn during Stage III for LD	ApEn during Stage III for RD	ApEn during Stage III for LM	ApEn during Stage III for RM	ApEn during Stage IV for LT	ApEn during Stage IV for RT	ApEn during Stage IV for LD	ApEn during Stage IV for RD	ApEn during Stage IV for LM	ApEn during Stage IV for RM
1	1	73	7.8167	213.283	0.6127	0.6065	0.5617	0.6102	0.5076	0.5929	0.567	0.5889	0.5116	0.6222	0.5153	0.6327	0.5598	0.4262	0.4971	0.4533	0.4966	0.4692	0.6291	0.4799	0.5761	0.5408	0.6177	0.5591
2	1	90	6.0667	106.717	0.6126	0.6341	0.5822	0.6208	0.5327	0.6181	0.5228	0.5377	0.3878	0.5721	0.5036	0.6226	0.5085	0.5382	0.3283	0.4522	0.4915	0.4975	0.7148	0.7706	0.4907	0.6018	0.6261	0.7604
3	1	90	6.8167	63.8833	0.6946	0.6917	0.6872	0.6997	0.578	0.7343	0.7316	0.7653	0.7529	0.7932	0.6571	0.7999	0.6074	0.5854	0.6075	0.5872	0.5529	0.6068	0.6781	0.6564	0.6732	0.6035	0.6561	0.71
4	1	73	5.7833	122.25	0.6312	0.5874	0.6573	0.603	0.5929	0.6228	0.5811	0.598	0.5629	0.6027	0.4999	0.6426	0.4857	0.4039	0.4983	0.4164	0.5148	0.4463	0.613	0.5166	0.6287	0.5266	0.7498	0.5376
5	1	83	4.4167	41.9	0.6619	0.6615	0.6501	0.6596	0.5021	0.6755	0.6809	0.6629	0.7263	0.7241	0.682	0.7698	0.6737	0.7802	0.7183	0.7561	0.6214	0.8174	0.653	0.6957	0.6671	0.6954	0.6301	0.7853
6	1	92	5.6	45.9	0.5075	0.5041	0.5211	0.51	0.5411	0.5027	0.5115	0.5213	0.545	0.5813	0.6005	0.5772	0.467	0.4566	0.476	0.5173	0.5394	0.4702	0.4966	0.5234	0.4704	0.5602	0.5259	0.5324
7	1	88	7.25	102.35	0.6336	0.6589	0.565	0.6296	0.5517	0.5947	0.6195	0.6536	0.6269	0.6619	0.6272	0.6585	0.4996	0.5561	0.4818	0.5212	0.4841	0.4685	0.5024	0.6666	0.4809	0.5572	0.4219	0.5215
8	2	48	5.3	124.25	0.5666	0.5498	0.5628	0.5425	0.5298	0.5691	0.6275	0.6343	0.6596	0.6551	0.5888	0.6956	0.3642	0.3595	0.3902	0.3764	0.401	0.4183	0.5258	0.5122	0.5266	0.5155	0.5366	0.5577
9	2	38	4	90.4833	0.5536	0.5239	0.5383	0.5109	0.4855	0.5381	0.5685	0.5459	0.541	0.5018	0.4871	0.5658	0.4528	0.4508	0.4441	0.4676	0.3997	0.4977	0.5953	0.5751	0.5535	0.5875	0.4718	0.6255
10	2	39	5.4833	117.983	0.6246	0.6223	0.651	0.6197	0.5814	0.6001	0.5108	0.5524	0.566	0.5616	0.5435	0.554	0.4194	0.447	0.481	0.4721	0.4725	0.4753	0.5989	0.6096	0.5846	0.6025	0.6136	0.5755
11	2	38	5.9	182.25	0.6483	0.6729	0.644	0.6571	0.4918	0.6384	0.4543	0.5085	0.4199	0.4819	0.4139	0.3933	0.4243	0.3571	0.412	0.3969	0.333	0.368	0.6233	0.5644	0.6204	0.5323	0.442	0.5339
12	2	43	5.0333	78.2667	0.5815	0.547	0.5364	0.5447	0.4311	0.5292	0.533	0.499	0.5197	0.5145	0.4136	0.5196	0.5099	0.4417	0.4915	0.4393	0.3902	0.3854	0.6799	0.6215	0.6495	0.6067	0.4919	0.5201
13	2	43	2.85	232.733	0.6008	0.4769	0.5253	0.4606	0.5052	0.4775	0.6428	0.5934	0.536	0.6143	0.5061	0.598	0.4992	0.4619	0.4694	0.466	0.4372	0.4043	0.694	0.5963	0.6313	0.581	0.5883	0.5152
14	2	36	4.8667	149.317	0.5702	0.6139	0.5523	0.6093	0.5516	0.5649	0.373	0.3925	0.4195	0.4221	0.4287	0.4283	0.4613	0.4449	0.4719	0.4592	0.4839	0.4824	0.5618	0.584	0.5538	0.5871	0.5561	0.6047
	Abbreviations:
	F,Female;M,Male
	Stage I,pre-anesthesia stage
	Stage II,administration stage
	Stage III,recovery stage
	Stage IV,post-anesthesia stage
	LT, the left telencephalon
	RT, the right telencephalon
	LD, the left diencephalon
	RD, the right diencephalon
	LM, the left mesencephalon
	RM, the right mesencephalon
