# Supplementary material for: The right thalamus may play an important role in anesthesia-awakening regulation in frogs
Source: PeerJ. 2018 Mar 15;6:e4516. doi: 10.7717/peerj.4516 (PMC5857353; doi:10.7717/peerj.4516)
Supplement: Supplemental Information 2 — This table inclues animals’ weights, durations of Stages II and III, and permutation entropy for each stage. [file peerj-06-4516-s002.xlsx]

## Sheet: Sheet1
Subject ID	Sex(1F；2M)	Weight（g)	Duration of Stage II(min)	Duration of Stage III(min)	PE during Stage I for LT	PE during Stage I for RT	PE during Stage I for LD	PE during Stage I for RD	PE during Stage I for LM	PE during Stage I for RM	PE during Stage II for LT	PE during Stage II for RT	PE during Stage II for LD	PE during Stage II for RD	PE during Stage II for LM	PE during Stage II for RM	PE during Stage III for LT	PE during Stage III for RT	PE during Stage III for LD	PE during Stage III for RD	PE during Stage III for LM	PE during Stage III for RM	PE during Stage IV for LT	PE during Stage IV for RT	PE during Stage IV for LD	PE during Stage IV for RD	PE during Stage IV for LM	PE during Stage IV for RM
1	1	73	7.8167	213.283	0.8761	0.8757	0.8829	0.8787	0.8767	0.8805	0.8437	0.8457	0.8504	0.8529	0.8544	0.8642	0.8408	0.8166	0.8441	0.8201	0.8512	0.8406	0.8422	0.8203	0.8418	0.8157	0.8655	0.8408
2	1	90	6.0667	106.717	0.8843	0.8844	0.8847	0.8881	0.8686	0.8868	0.8795	0.87	0.8167	0.8739	0.8686	0.8821	0.874	0.8598	0.818	0.8485	0.8655	0.8598	0.901	0.8935	0.8955	0.8938	0.9075	0.9129
3	1	90	6.8167	63.8833	0.8623	0.8813	0.8812	0.888	0.8784	0.8942	0.865	0.8845	0.8908	0.8941	0.887	0.9003	0.8399	0.8574	0.8715	0.8775	0.8613	0.8942	0.849	0.8691	0.8785	0.894	0.8903	0.9027
4	1	73	5.7833	122.25	0.8747	0.8762	0.8821	0.8878	0.8789	0.8939	0.8701	0.8669	0.8643	0.8726	0.8573	0.8787	0.8304	0.8262	0.8365	0.8515	0.8456	0.8602	0.8849	0.8829	0.8881	0.8991	0.9077	0.9046
5	1	83	4.4167	41.9	0.8565	0.8745	0.8609	0.8741	0.8482	0.8922	0.8746	0.8832	0.8863	0.8915	0.8904	0.8963	0.8617	0.8929	0.8775	0.8934	0.882	0.9121	0.849	0.877	0.8568	0.8826	0.8788	0.9091
6	1	92	5.6	45.9	0.8615	0.8562	0.8702	0.8692	0.8805	0.8702	0.8425	0.8547	0.8529	0.8745	0.8685	0.873	0.8448	0.8469	0.8631	0.8856	0.8859	0.8776	0.8559	0.8527	0.8673	0.8874	0.8854	0.881
7	1	88	7.25	102.35	0.8629	0.8717	0.8683	0.8612	0.8763	0.8786	0.8746	0.8809	0.8891	0.8812	0.8937	0.8976	0.8481	0.8607	0.857	0.8494	0.8748	0.8778	0.8429	0.8655	0.8515	0.8388	0.8555	0.8689
8	2	48	5.3	124.25	0.8793	0.8775	0.8803	0.8798	0.8761	0.8827	0.8677	0.8698	0.8713	0.8738	0.8648	0.8848	0.7824	0.7826	0.8039	0.8103	0.8124	0.8384	0.8324	0.8306	0.8395	0.8483	0.8475	0.866
9	2	38	4	90.4833	0.8697	0.8716	0.8761	0.8796	0.871	0.8903	0.8381	0.8448	0.8308	0.8423	0.8256	0.8653	0.8259	0.8317	0.8276	0.8521	0.8192	0.8676	0.8341	0.8367	0.8355	0.8602	0.8522	0.886
10	2	39	5.4833	117.983	0.8616	0.861	0.8631	0.8593	0.8771	0.8818	0.8349	0.8312	0.8526	0.8389	0.8674	0.8563	0.8331	0.8481	0.8367	0.852	0.8625	0.88	0.8482	0.8545	0.8362	0.8506	0.8888	0.8786
11	2	38	5.9	182.25	0.8612	0.8685	0.8609	0.8693	0.8429	0.8747	0.8509	0.859	0.8392	0.8555	0.8401	0.848	0.8308	0.8203	0.8289	0.8506	0.8103	0.8492	0.8431	0.8468	0.8605	0.8673	0.8487	0.8725
12	2	43	5.0333	78.2667	0.871	0.868	0.871	0.8652	0.8376	0.872	0.8577	0.8543	0.8611	0.8604	0.8233	0.8685	0.8528	0.8463	0.8556	0.8467	0.8141	0.8661	0.8614	0.868	0.8779	0.8598	0.8631	0.8908
13	2	43	2.85	232.733	0.859	0.8747	0.8789	0.8857	0.8879	0.8996	0.8597	0.8311	0.8402	0.8373	0.8443	0.8466	0.8303	0.8529	0.8429	0.8725	0.8382	0.8775	0.8568	0.8647	0.8665	0.8811	0.8878	0.8924
14	2	36	4.8667	149.317	0.8542	0.8431	0.8648	0.8402	0.8648	0.8668	0.8415	0.844	0.8659	0.8474	0.8619	0.8825	0.8387	0.8235	0.8599	0.8302	0.8638	0.8532	0.8347	0.8183	0.868	0.8161	0.8683	0.8587
	Abbreviations:
	F,Female;M,Male
	Stage I,pre-anesthesia stage
	Stage II,administration stage
	Stage III,recovery stage
	Stage IV,post-anesthesia stage
	LT, the left telencephalon
	RT, the right telencephalon
	LD, the left diencephalon
	RD, the right diencephalon
	LM, the left mesencephalon
	RM, the right mesencephalon
